# Supplementary material for: Design of 3D WO3/h-BN nanocomposites for efficient visible-light-driven photocatalysis
Source: Royal Society of Chemistry journal article supplement (doi:10.1039/c7ra02929b), 2017-01-01
Supplement: c7ra02929b1.pdf [file c7ra02929b1.pdf]

## Support Information

### Design of 3D WO<sub>3</sub>/h-BN nanosheets nanocomposites for efficient visible-light-driven photocatalysis

Jia Yan<sup>a</sup>, Jiemin Gu<sup>a</sup>, Xin Wang<sup>a</sup>, Yamin Fan<sup>a</sup>, Yan Zhao<sup>a</sup>, Jiabiao Lian<sup>a</sup>, Yuanguo Xu<sup>a</sup>, Hui Xu<sup>a,\*</sup>,  
Yanhua Song<sup>b</sup>, Huaming Li<sup>a\*</sup>

*a. School of Chemistry and Chemical Engineering, Institute for Energy Research, Jiangsu University, Zhenjiang 212013, P. R. China.*

*b. School of Environmental and Chemical, Engineering, Jiangsu University of Science and Technology, Zhenjiang 212003, P. R. China*

**\*Corresponding author:** Tel.: +86-0511-88799500; Fax: +86-0511-88799500;

E-mail address: [xh@ujs.edu.cn](mailto:xh@ujs.edu.cn), [lihm@ujs.edu.cn](mailto:lihm@ujs.edu.cn)

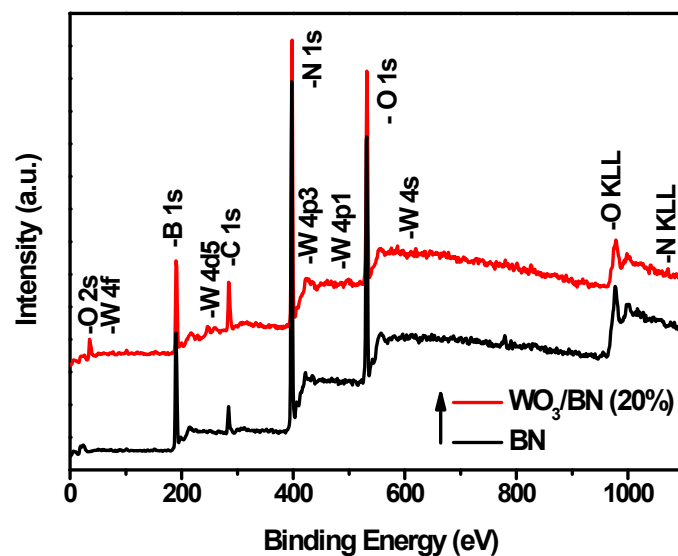

Fig. S1 XPS spectra of the 20% WO<sub>3</sub>/BN nanocomposite.

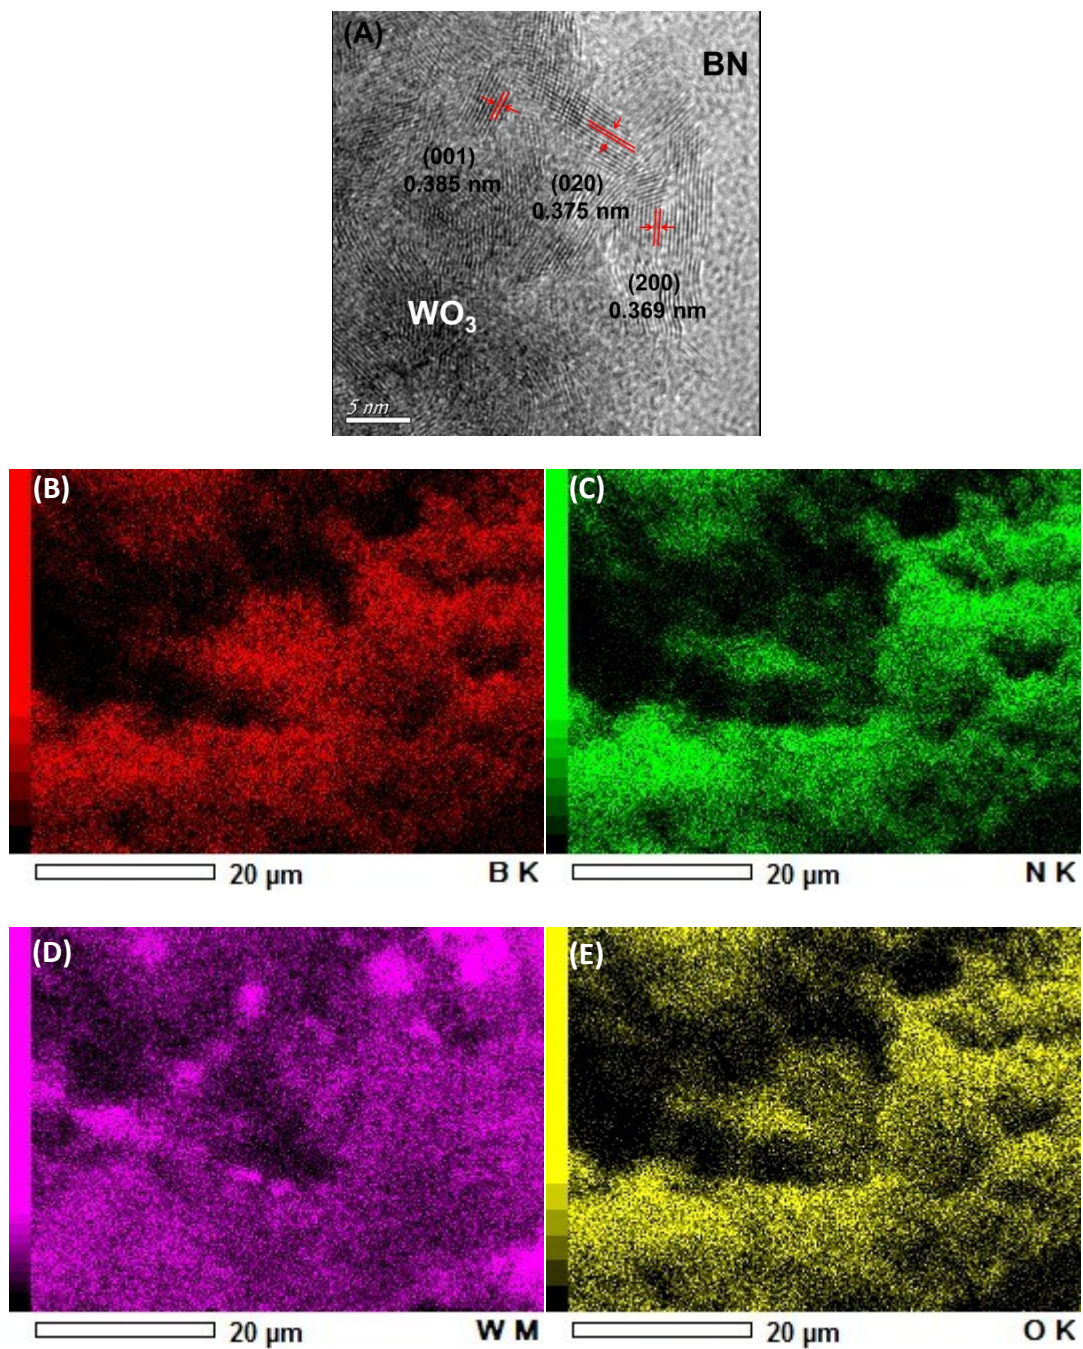

Fig. S2 (A) The HRTEM of the 20% WO<sub>3</sub>/BN nanocomposite, and EDS maps of element (B) B, (C) N, (D) W, and (E) O, respectively.

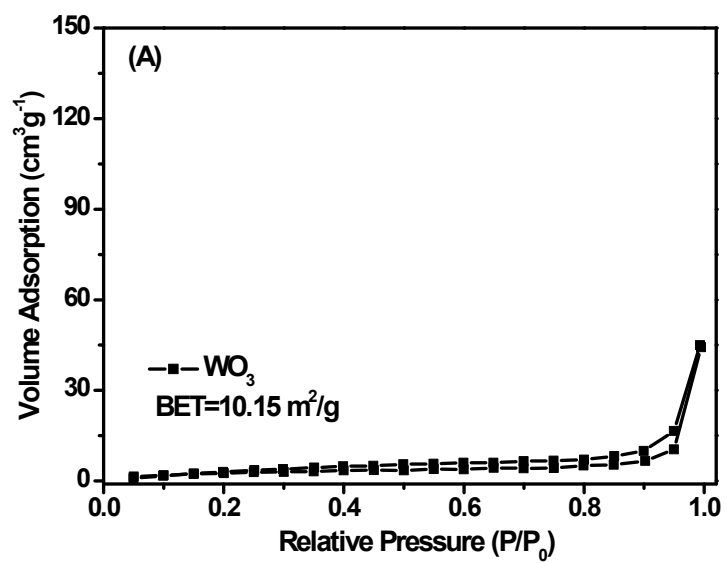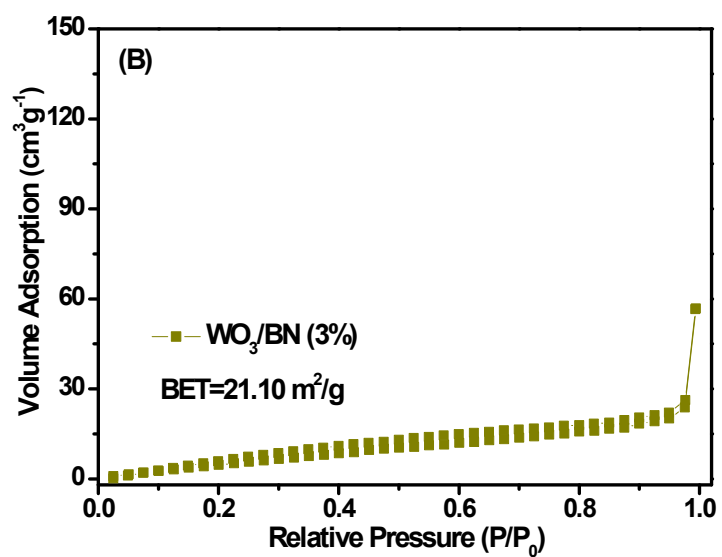

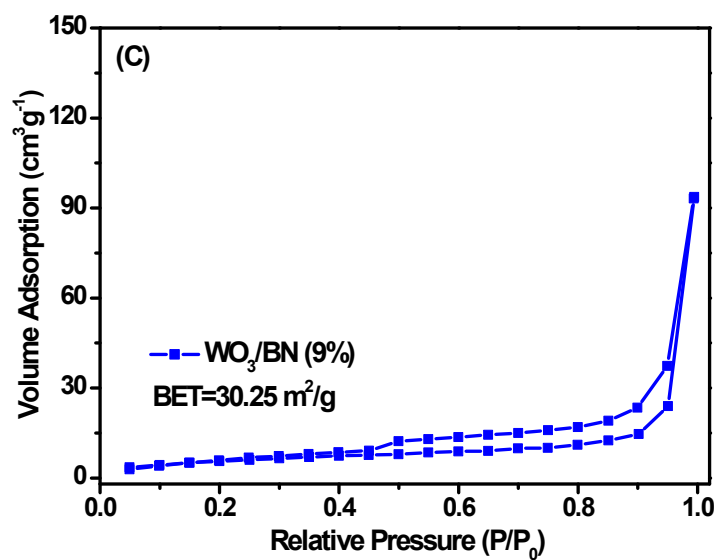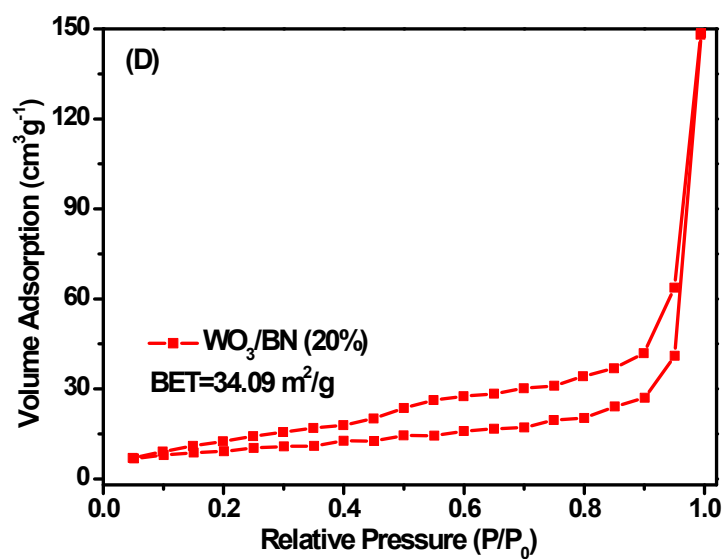

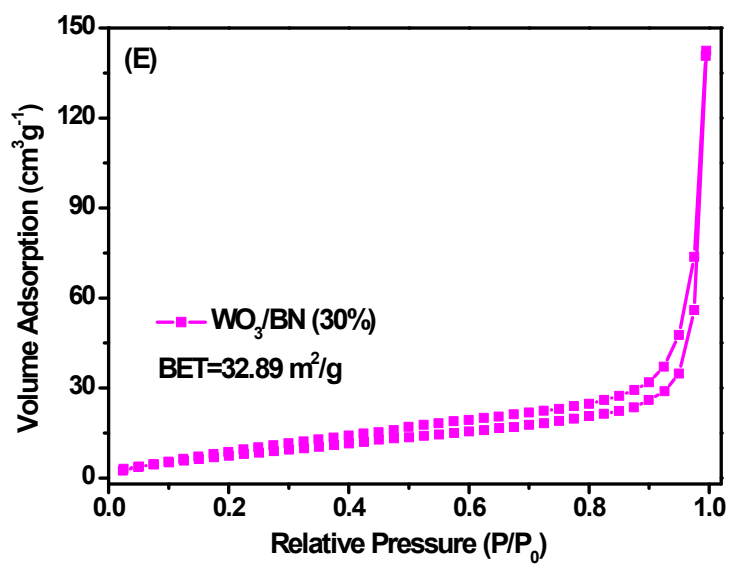

Fig. S3 Nitrogen adsorption-desorption isotherms of (A)  $\text{WO}_3$  and  $\text{WO}_3/\text{BN}$  nanocomposites: (B) 3%; (C) 9%; (D) 20% and (E) 30%.

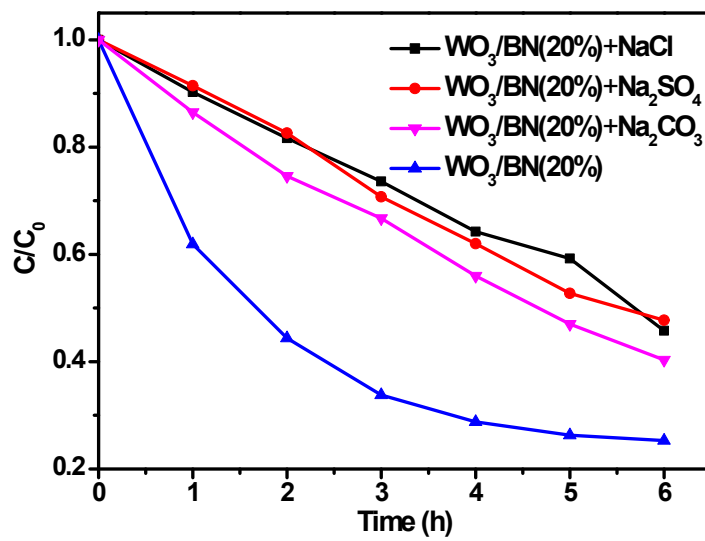

Fig. S4 The photocatalytic degradation performance of RhB in the presence of Cl<sup>-</sup>, SO<sub>4</sub><sup>2-</sup>, CO<sub>3</sub><sup>2-</sup>, respectively

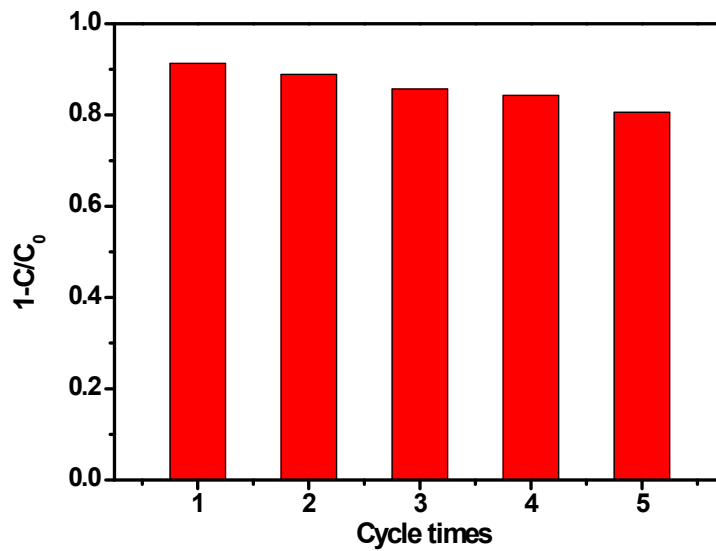

Fig. S5 Cycling runs of 20% WO<sub>3</sub>/BN nanocomposite for the degradation of RhB.

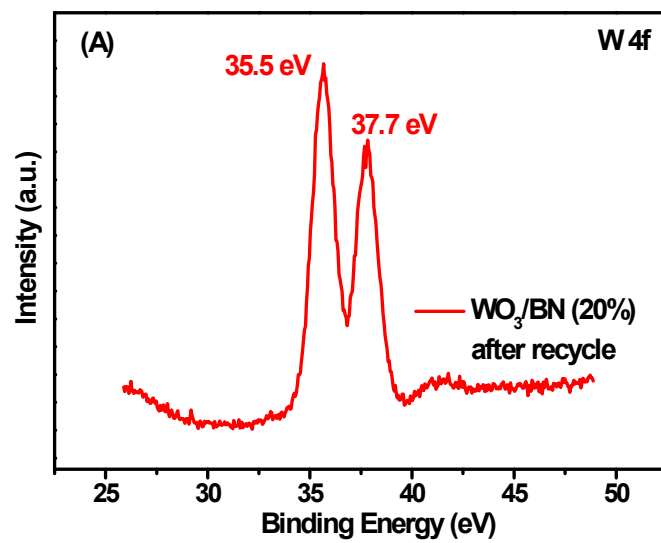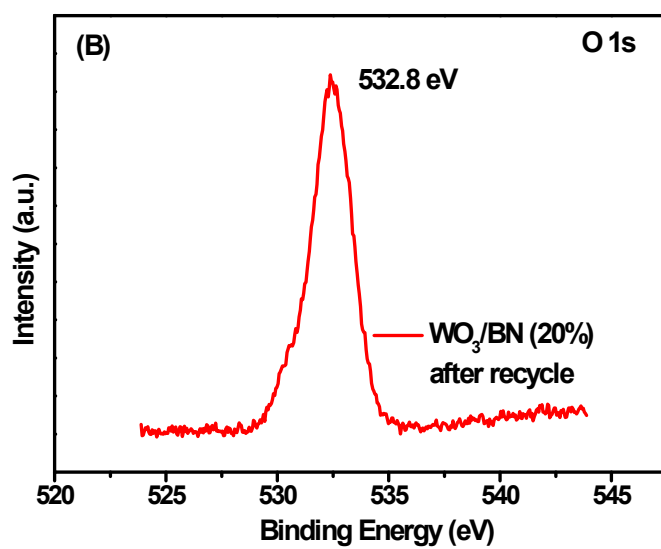

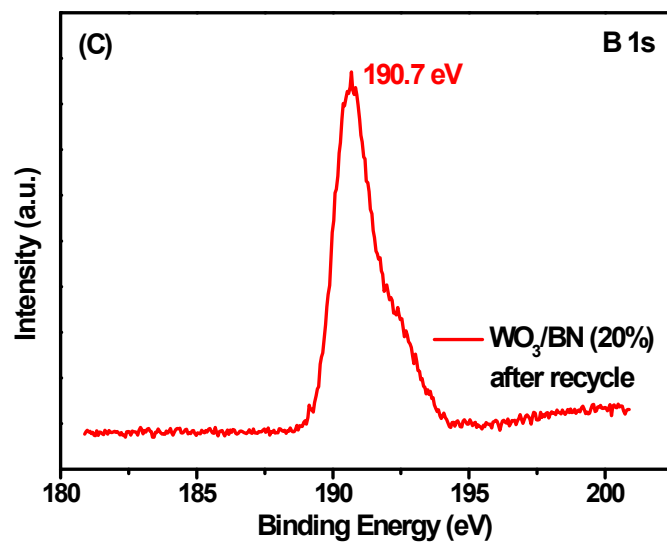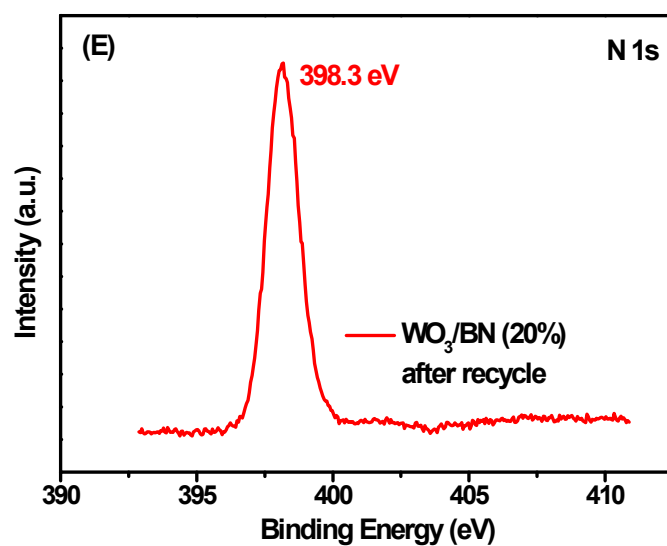

Fig. S6 High resolution XPS spectra of 20% WO<sub>3</sub>/BN nanocomposite after recycle: (A) W 4f, (B) O 1s, (C) B 1s, (D) N 1s.
